# Supplementary material
Source: PubMed Central journal article supplement (PMC5319605)
Supplement: NIHMS786053-supplement-Supp_Info.pdf [file NIHMS786053-supplement-Supp_Info.pdf]

Supplementary Material for “Linear Regression with a Randomly  
Censored Covariate: Application to an Alzheimer’s Study” by Folefac  
D. Atem, Jing Qian, Jacqueline E. Maye, Keith A. Johnson and  
Rebecca A. Betensky

Table S.1: Estimation and testing of  $\alpha_1$ : light censoring independent of  $Y$ ; 1000 replicates (5000 for type I error)

| Method                | Bias   | SD     | SE     | MSE    | Type 1 error | Power |
|-----------------------|--------|--------|--------|--------|--------------|-------|
| n=100                 |        |        |        |        |              |       |
| No Censoring          | 0.0024 | 0.2766 | 0.2504 | 0.0627 | 0.053        | 0.558 |
| Complete Case         | 0.0452 | 0.4122 | 0.1433 | 0.1433 | 0.056        | 0.344 |
| Single Imputation     | 0.0440 | 0.3126 | 0.2592 |        |              |       |
| Multiple Imputation   | 0.0550 | 0.3400 | 0.3355 | 0.1156 | 0.052        | 0.340 |
| Deletion Thresholding | 0.0881 | 0.2592 | 0.2635 | 0.0772 | 0.059        | 0.199 |
| Complete Thresholding | 0.0944 | 0.2532 | 0.2514 | 0.0720 | 0.060        | 0.347 |
| Reverse survival      |        |        |        |        | 0.053        | 0.387 |
| n=250                 |        |        |        |        |              |       |
| No Censoring          | 0.0020 | 0.1597 | 0.1422 | 0.0202 | 0.048        | 0.911 |
| Complete Case         | 0.0302 | 0.2389 | 0.2249 | 0.0515 | 0.051        | 0.666 |
| Single Imputation     | 0.0290 | 0.1999 | 0.1742 |        |              |       |
| Multiple Imputation   | 0.0386 | 0.2009 | 0.1847 | 0.0356 | 0.052        | 0.599 |
| Deletion Thresholding | 0.0599 | 0.1662 | 0.1654 | 0.0309 | 0.056        | 0.310 |
| Complete Thresholding | 0.0491 | 0.1584 | 0.1579 | 0.0273 | 0.053        | 0.405 |
| Reverse survival      |        |        |        |        | 0.045        | 0.783 |

Table S.2: Estimation and testing of  $\alpha_1$ : heavy censoring independent of  $Y$ ; 1000 replicates (5000 for type I error)

| Method                | Bias   | SD     | SE     | MSE    | Type 1 error | Power |
|-----------------------|--------|--------|--------|--------|--------------|-------|
| n=100                 |        |        |        |        |              |       |
| No Censoring          | 0.0024 | 0.2766 | 0.2504 | 0.0627 | 0.053        | 0.558 |
| Complete Case         | 0.1049 | 0.8511 | 0.8957 | 0.7354 | 0.056        | 0.142 |
| Single Imputation     | 0.1022 | 0.6359 | 0.5196 |        |              |       |
| Multiple Imputation   | 0.1001 | 0.6159 | 0.5677 | 0.3323 | 0.055        | 0.194 |
| Deletion Thresholding | 0.1091 | 0.2819 | 0.2858 | 0.0936 | 0.044        | 0.117 |
| Complete Thresholding | 0.1000 | 0.2741 | 0.2744 | 0.0851 | 0.044        | 0.207 |
| Reverse survival      |        |        |        |        | 0.057        | 0.273 |
| n=250                 |        |        |        |        |              |       |
| No Censoring          | 0.0020 | 0.1597 | 0.1422 | 0.0202 | 0.048        | 0.911 |
| Complete Case         | 0.0651 | 0.5639 | 0.5451 | 0.3014 | 0.056        | 0.179 |
| Single Imputation     | 0.0999 | 0.4111 | 0.3069 |        |              |       |
| Multiple Imputation   | 0.0983 | 0.3562 | 0.3236 | 0.1144 | 0.056        | 0.341 |
| Deletion Thresholding | 0.0994 | 0.1711 | 0.1773 | 0.0413 | 0.048        | 0.270 |
| Complete Thresholding | 0.0612 | 0.1678 | 0.1606 | 0.0295 | 0.046        | 0.373 |
| Reverse survival      |        |        |        |        | 0.057        | 0.572 |
